# Supplementary material
Source: PubMed Central journal article supplement (PMC3501079)
Supplement: supp_M112.398826_jbc.M112.398826-1.pdf [file supp_M112.398826_jbc.M112.398826-1.pdf]

**Diversification of the structural determinants of fibroblast growth factor-heparin interactions;  
implications for binding specificity**

Ruoyan Xu<sup>1</sup>, Alessandro Ori<sup>1,2</sup>, Timothy R Rudd<sup>1,3</sup>, Katarzyna A. Uniewicz<sup>1,4</sup>, Yassir A. Ahmed<sup>1</sup>, Scott E Guimond<sup>1</sup>, Mark A Skidmore<sup>1,5</sup>, Giuliano Siligardi<sup>6</sup>, Edwin A Yates<sup>1\*</sup> and David G Fernig<sup>1\*</sup>

1. Institute of Integrative Biology, Department of Chemical and Structural Biology, University of Liverpool, Crown Street, Liverpool. L69 7ZB UK

2. Structural and Computational Biology Unit, European Molecular Biology Laboratory. 69117 Heidelberg, Germany

3. Istituto di Chimica e Biochimica, "G. Ronzoni", Via G. Colombo 81, Milano. 20133 Italy

4. PromoCell GmbH, Sickingenstr. 63/65, 69126 Heidelberg, Germany

5. Institute for Science and Technology in Medicine, Huxley Building, Keele University, Staffs. ST5 5BG UK

6. Diamond Light Source Ltd., Harwell Science and Innovation Campus, Didcot. OX11 0DE UK

\*Equally contributing authors

Running title: Heparin binding sites of fibroblast growth factors

Corresponding authors: Professor DG. Fernig and Dr EA Yates, Department of Structural and Chemical Biology, Biosciences Building, Crown Street, University of Liverpool, Liverpool, L69 7ZB, UK. Tel. +44 (0)151 795 4471, Fax +44 (0)151 795 4406, Email: dgfernig@liverpool.ac.uk

**SUPPLEMENTAL CONTENTS**

Figure S1 Optical biosensor analysis of the interaction of FGF-1 with DP8

Figure S2 Optical biosensor analysis of the interaction of FGF-1 with DP8

Figure S3 Optical biosensor analysis of the interaction of FGF-1 with DP8

Figure S4 Optical biosensor analysis of the interaction of FGF-7 with DP8

Figure S5 Optical biosensor analysis of the interaction of FGF-7 with DP8

Figure S6 Optical biosensor analysis of the interaction of FGF-7 with DP8

Figure S7 Optical biosensor analysis of the interaction of FGF-9 with DP8

Figure S8 Optical biosensor analysis of the interaction of FGF-9 with DP8

Figure S9 Optical biosensor analysis of the interaction of FGF-9 with DP8

FIGURE S 10 Microscale Thermophoresis analysis of the interaction of FGF-18 with DP8

FIGURE S11 Differential scanning fluorimetry FGF-9 bound to heparin.

FIGURE S12 Differential scanning fluorimetry FGF-21 bound to heparin.

FIGURE S13 Differential scanning fluorimetry FGF-1, FGF-2 and FGF-18 binding to heparin derivatives.

Table S1 Peptides identified by Protect and Label correspond heparin binding sites

Table S2 Comparison of the secondary structures FGFs deduced from SRCD spectra.

Table S3 FGF-7 and heparin complexes' concentrations and their mean TM values based on 3 repeats ( $\pm$  SE).

Table S4 FGF-9 and heparin complexes' concentrations and their mean TM values based on 3 repeats ( $\pm$  SE).

Table S5 FGF-21 and heparin complexes' concentrations and their mean TM values based on 3 repeats ( $\pm$  SE).

## SUPPLEMENTAL FIGURES

### FIGURE S1 Optical biosensor analysis of the interaction of FGF-1 with DP8

The binding kinetics of FGF-1 to immobilized DP8 were measured, as described under “**Experimental procedures**”. Different concentrations of FGF-1 were added to a streptavidin-derivatized amino silane cuvette functionalized with reducing end biotinylated DP8 (**Experimental procedures**). *A*, the association curves of the binding of different concentrations of FGF-1 were followed for one min. *B-F*, The distribution of the data points (jagged line) around a one-site model (horizontal line at 0 arc s) is shown for each of the concentrations of the FGF-1 used in the binding assay in panel *A*. Instrument noise is  $\pm 0.5$  arc s. Concentrations of FGF-1 are 85.9 nM (*B*), 60.1 nM (*C*), 45.8 nM (*D*), 22.9 nM (*E*) and 17.2 nM (*F*). *G*, Relationships between slope of initial rate, determined from a one-site binding model and concentration of FGF-1. *H*, relationships between  $k_{on}$ , determined from a one-site model and concentration of FGF-1.

Figure S1

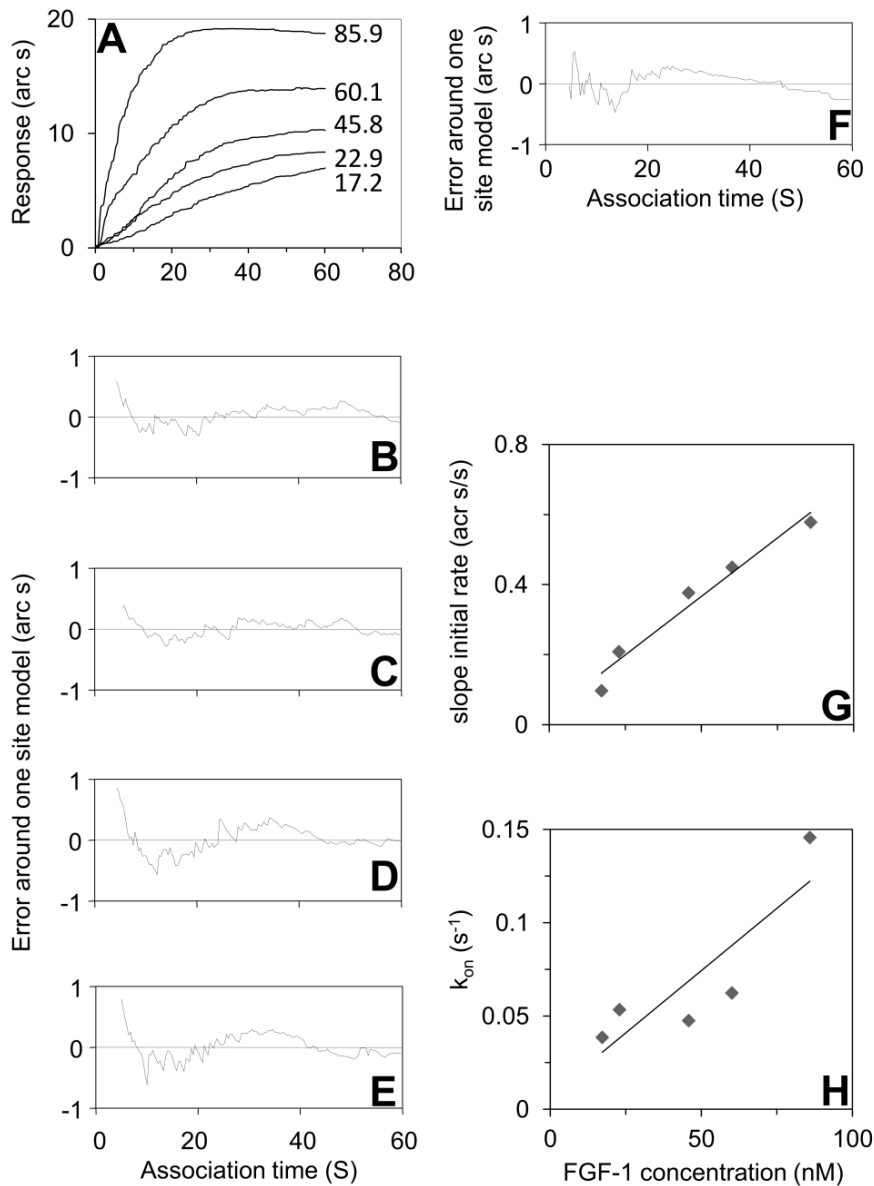

### FIGURE S2 Optical biosensor analysis of the interaction of FGF-1 with DP8

The binding kinetics of FGF-1 to immobilized DP8 were measured, as described under “**Experimental procedures**”. Different concentrations of FGF-1 were added to a streptavidin-derivatized amino silane cuvette functionalized with reducing end biotinylated DP8 (**Experimental procedures**). *A*, the association curves of the binding of different concentrations of FGF-1 were followed for one min. *B-F*, The distribution of the data points (jagged line) around a one-site model (horizontal line at 0 arc s) is shown for each of the concentrations of the FGF-1 used in the binding assay in panel *A*. Instrument noise is  $\pm 0.5$  arc s. Concentrations of FGF-1 are 22.8 nM (*B*), 20 nM (*C*), 17.1 nM (*D*), 14.3 nM (*E*), 11.4 nM (*F*) 8.6 nM (*G*) and 5.7 nM (*H*). *I*, Relationships between slope of initial rate, determined from a one-site binding model and concentration of FGF-1. *J*, relationships between  $k_{on}$ , determined from a one-site model and concentration of FGF-1.

Figure S2

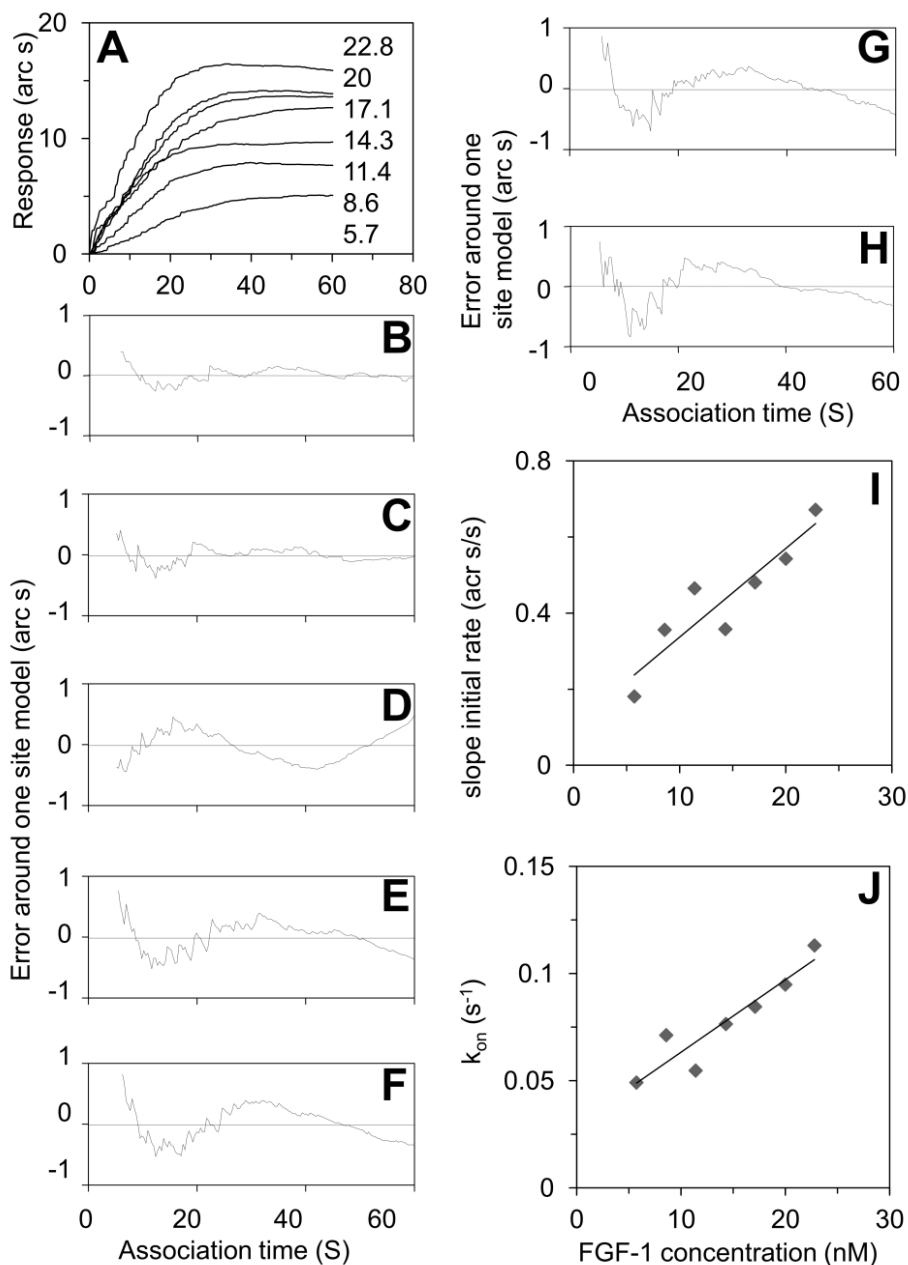

### FIGURE S3 Optical biosensor analysis of the interaction of FGF-1 with DP8

The binding kinetics of FGF-1 to immobilized DP8 were measured, as described under “**Experimental procedures**”. Different concentrations of FGF-1 were added to a streptavidin-derivatized amino silane cuvette functionalized with reducing end biotinylated DP8 (**Experimental procedures**). *A*, the association curves of the binding of different concentrations of FGF-1 were followed for one min. *B-F*, The distribution of the data points (jagged line) around a one-site model (horizontal line at 0 arc s) is shown for each of the concentrations of the FGF-1 used in the binding assay in panel A. Instrument noise is  $\pm 0.5$  arc s. Concentrations of FGF-1 are 22.8 nM (*B*), 20 nM (*C*), 14.3 nM (*D*), 11.4 nM (*E*), 8.6 nM (*F*) and 5.7 nM (*G*). *H*, Relationships between slope of initial rate, determined from a one-site binding model and concentration of FGF-1. *I*, relationships between  $k_{on}$ , determined from a one-site model and concentration of FGF-1.

Figure S3

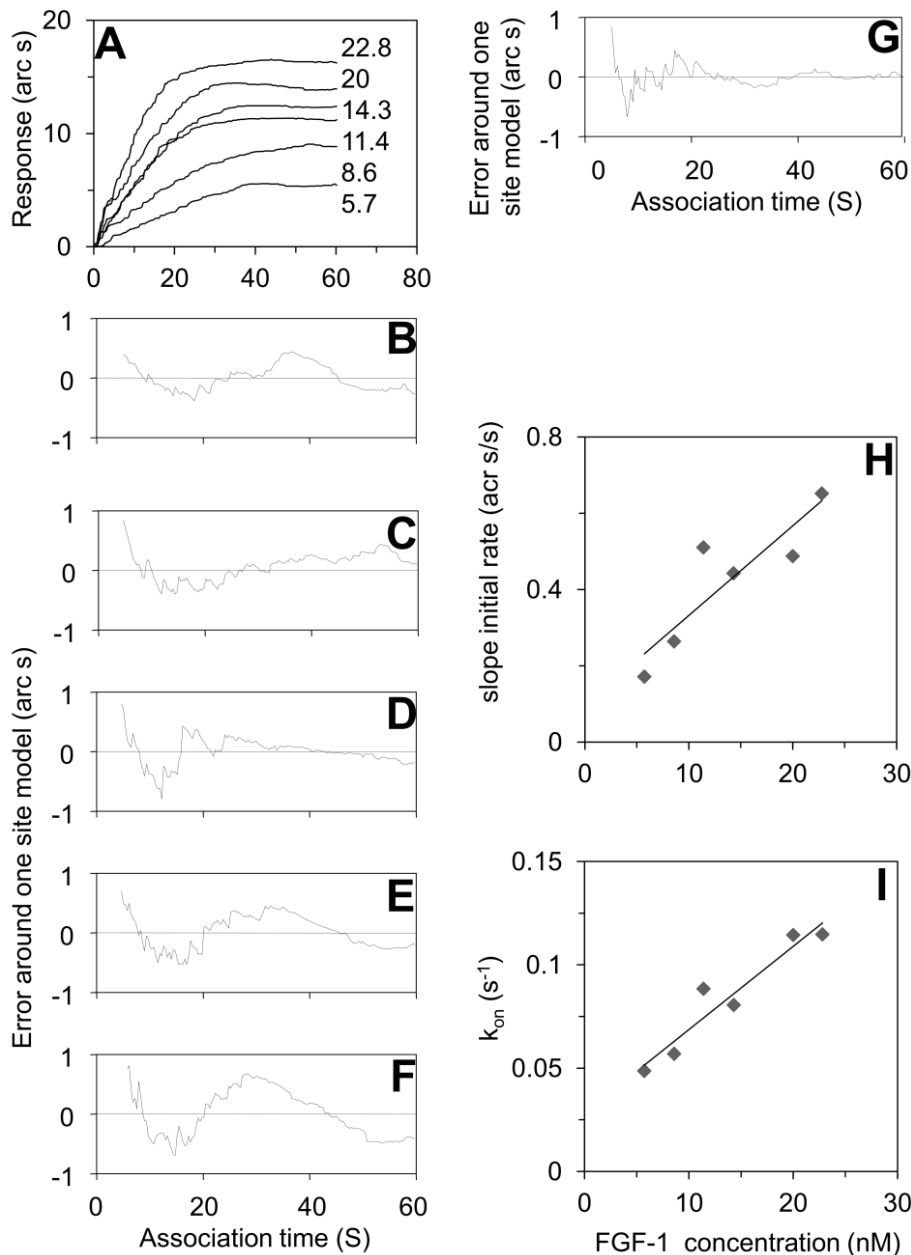

### FIGURE S4 Optical biosensor analysis of the interaction of FGF-7 with DP8

The binding kinetics of FGF-7 to immobilized DP8 were measured, as described under “**Experimental procedures**”. Different concentrations of FGF-7 were added to a streptavidin-derivatized amino silane cuvette functionalized with reducing end biotinylated DP8 (**Experimental procedures**). *A*, the association curves of the binding of different concentrations of FGF-7 were followed for one min. *B-F*, The distribution of the data points (jagged line) around a one-site model (horizontal line at 0 arc s) is shown for each of the concentrations of the FGF-7 used in the binding assay in panel *A*. Instrument noise is  $\pm 0.5$  arc s. Concentrations of FGF-7 are 190 nM (*B*), 106 nM (*C*), 95.2 nM (*D*), 47.6 nM (*E*), 23.8 nM (*F*) and 15.9 nM (*G*). *H*, Relationships between slope of initial rate, determined from a one-site binding model and concentration of FGF-7. *I*, relationships between  $k_{on}$ , determined from a one-site model and concentration of FGF-7.

Figure S4

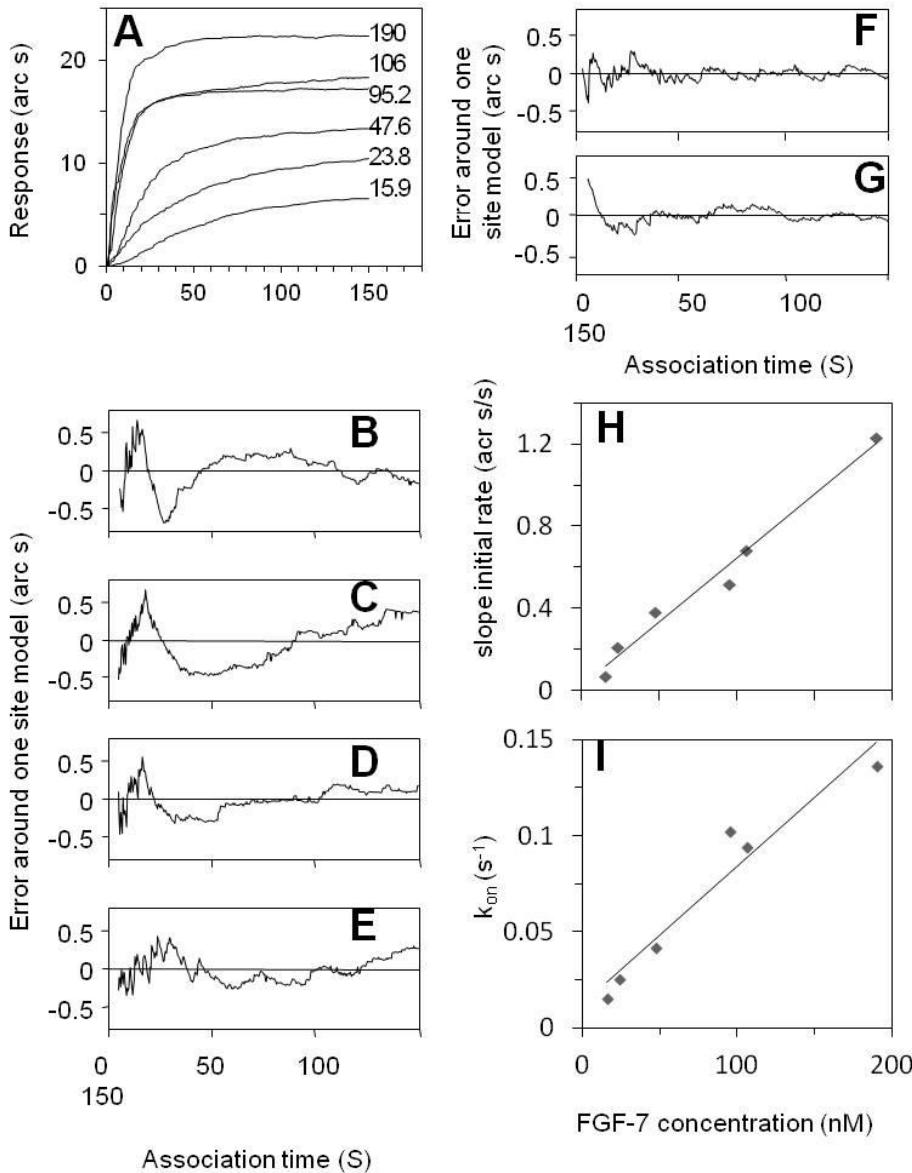

### FIGURE S5 Optical biosensor analysis of the interaction of FGF-7 with DP8

The binding kinetics of FGF-7 to immobilized DP8 were measured, as described under “**Experimental procedures**”. Different concentrations of FGF-7 were added to a streptavidin-derivatized amino silane cuvette functionalized with reducing end biotinylated DP8 (**Experimental procedures**). *A*, the association curves of the binding of different concentrations of FGF-7 were followed for one min. *B-F*, The distribution of the data points (jagged line) around a one-site model (horizontal line at 0 arc s) is shown for each of the concentrations of the FGF-7 used in the binding assay in panel *A*. Instrument noise is  $\pm 0.5$  arc s. Concentrations of FGF-7 are 212 nM (*B*), 105 nM (*C*), 79.5 nM (*D*), 47.7 nM (*E*), 31.8 nM (*F*) and 15.9 nM (*G*). *H*, Relationships between slope of initial rate, determined from a one-site binding model and concentration of FGF-7. *I*, relationships between  $k_{on}$ , determined from a one-site model and concentration of FGF-7.

Figure S5

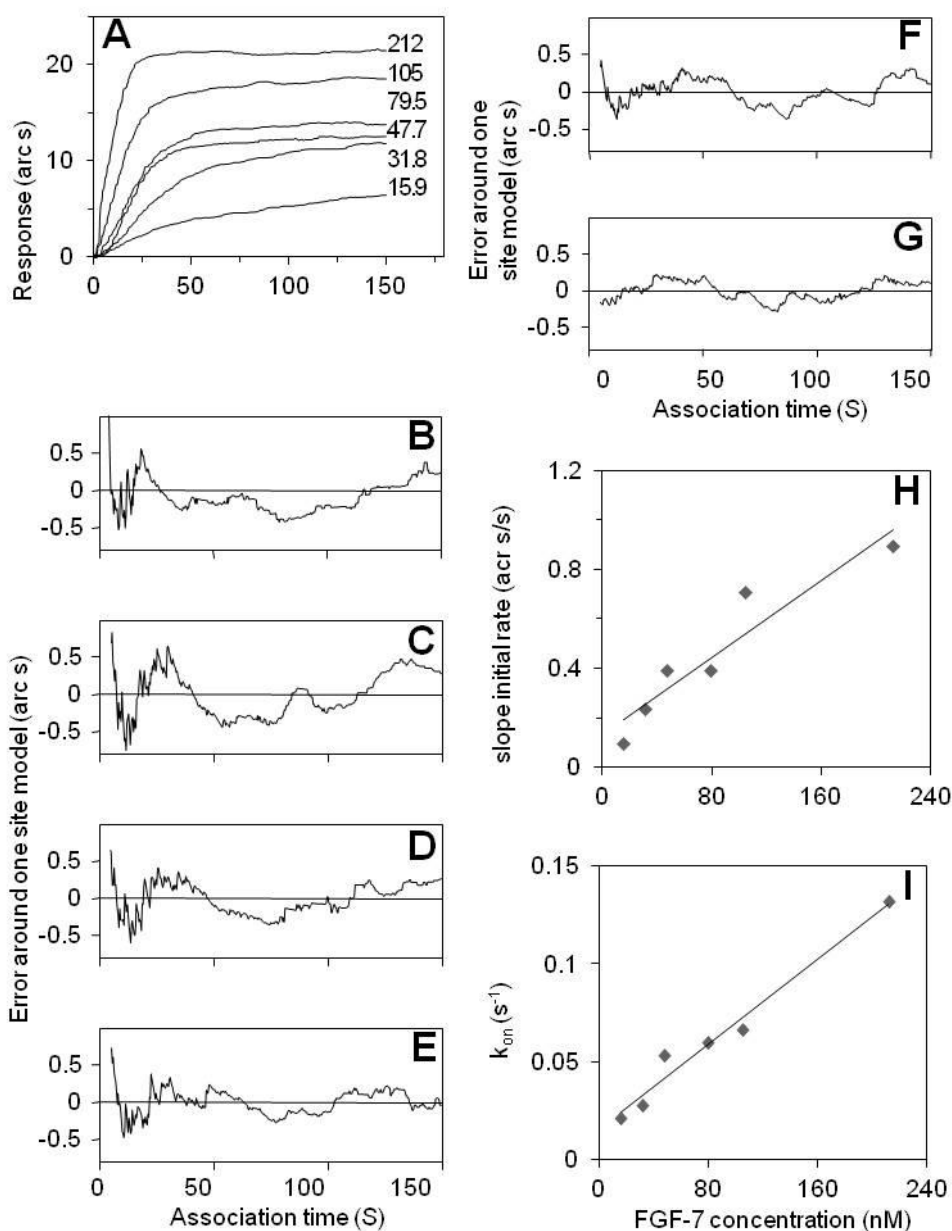

### FIGURE S6 Optical biosensor analysis of the interaction of FGF-7 with DP8

The binding kinetics of FGF-7 to immobilized DP8 were measured, as described under “**Experimental procedures**”. Different concentrations of FGF-7 were added to a streptavidin-derivatized amino silane cuvette functionalized with reducing end biotinylated DP8 (**Experimental procedures**). *A*, the association curves of the binding of different concentrations of FGF-7 were followed for one min. *B-F*, The distribution of the data points (jagged line) around a one-site model (horizontal line at 0 arc s) is shown for each of the concentrations of the FGF-7 used in the binding assay in panel *A*. Instrument noise is  $\pm 0.5$  arc s. Concentrations of FGF-7 are 106 nM (*B*), 79.4 nM (*C*), 47.7 nM (*D*), 23.8 nM (*E*) and 15.9 nM (*F*). *G*, Relationships between slope of initial rate, determined from a one-site binding model and concentration of FGF-7. *H*, relationships between  $k_{on}$ , determined from a one-site model and concentration of FGF-7.

Figure S6

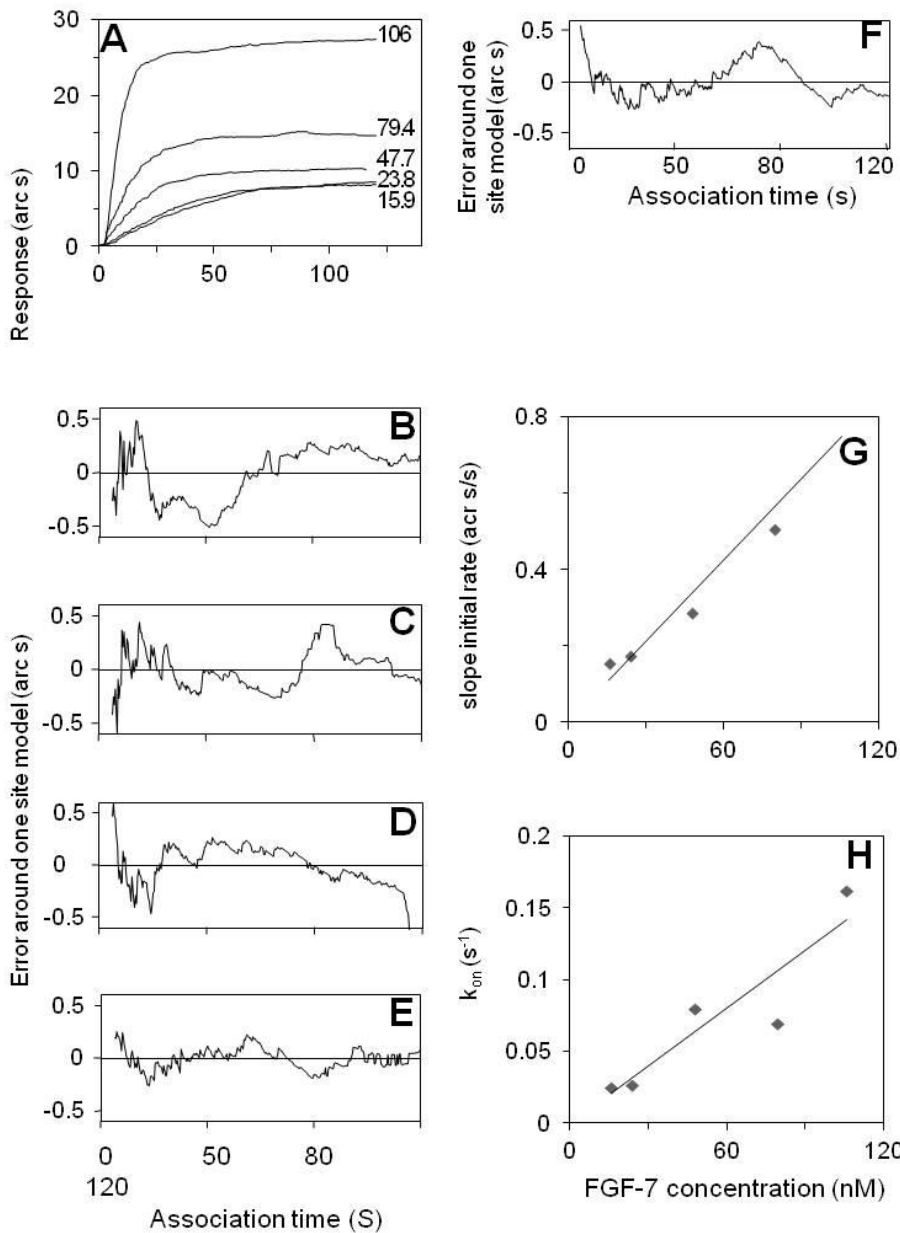

### FIGURE S7 Optical biosensor analysis of the interaction of FGF-9 with DP8

The binding kinetics of FGF-9 to immobilized DP8 were measured, as described under “**Experimental procedures**”. Different concentrations of FGF-9 were added to a streptavidin-derivatized amino silane cuvette functionalized with reducing end biotinylated DP8 (**Experimental procedures**). *A*, the association curves of the binding of different concentrations of FGF-9 were followed for one min. *B-F*, The distribution of the data points (jagged line) around a one-site model (horizontal line at 0 arc s) is shown for each of the concentrations of the FGF-9 used in the binding assay in panel *A*. Instrument noise is  $\pm 0.5$  arc s. Concentrations of FGF-9 are 169 nM (*B*), 152 nM (*C*), 102 nM (*D*), 76.2 nM (*E*) and 50.8 nM (*F*). *G*, Relationships between slope of initial rate, determined from a one-site binding model and concentration of FGF-9. *H*, relationships between  $k_{on}$ , determined from a one-site model and concentration of FGF-9.

Figure S7

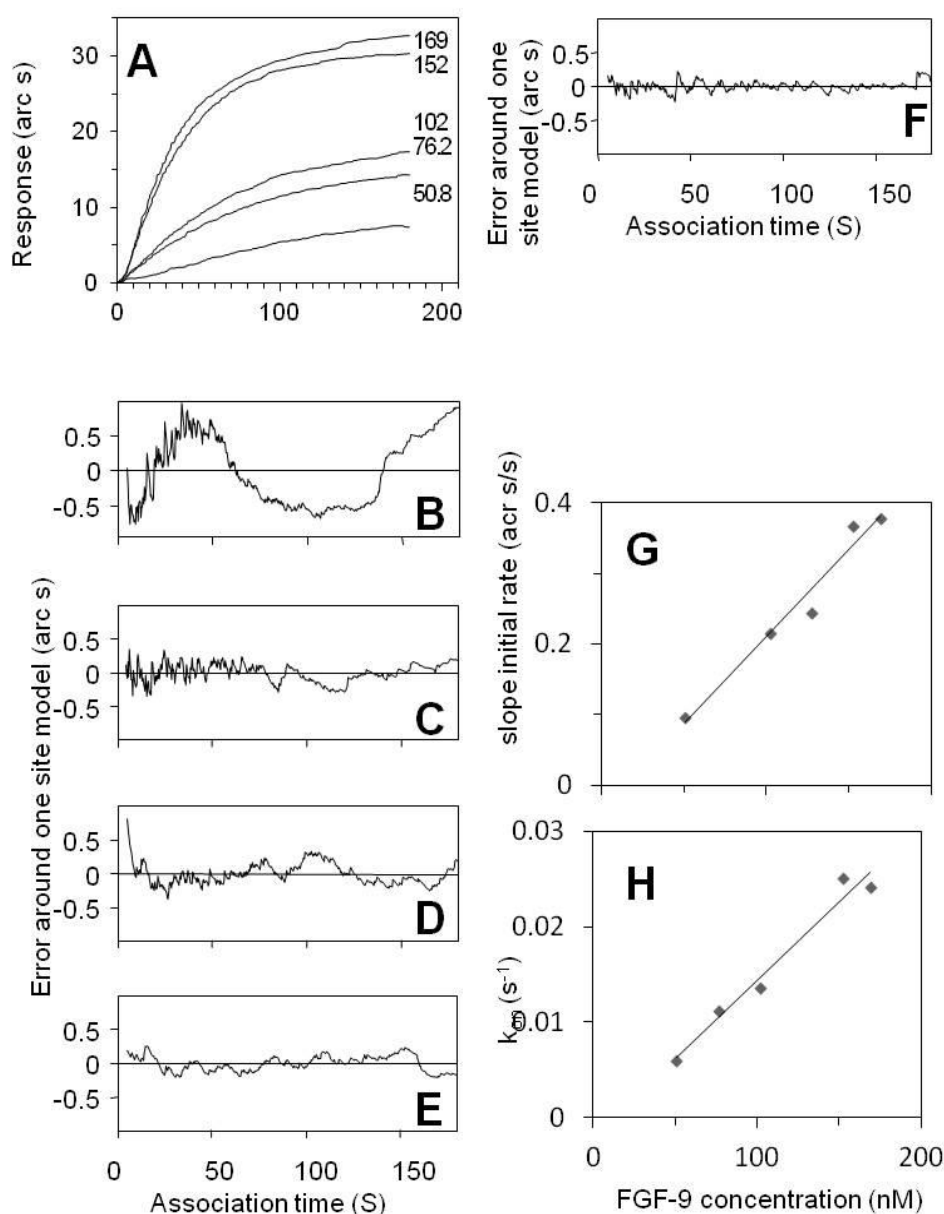



### FIGURE S8 Optical biosensor analysis of the interaction of FGF-9 with DP8

The binding kinetics of FGF-9 to immobilized DP8 were measured, as described under “**Experimental procedures**”. Different concentrations of FGF-9 were added to a streptavidin-derivatized amino silane cuvette functionalized with reducing end biotinylated DP8 (**Experimental procedures**). *A*, the association curves of the binding of different concentrations of FGF-9 were followed for one min. *B-F*, The distribution of the data points (jagged line) around a one-site model (horizontal line at 0 arc s) is shown for each of the concentrations of the FGF-9 used in the binding assay in panel *A*. Instrument noise is  $\pm 0.5$  arc s. Concentrations of FGF-9 are 169 nM (*B*), 152 nM (*C*), 127 nM (*D*), 102 nM (*E*), 76.2 nM (*F*) and 50.8 nM (*G*). *H*, Relationships between slope of initial rate, determined from a one-site binding model and concentration of FGF-9. *I*, relationships between  $k_{on}$ , determined from a one-site model and concentration of FGF-9.

Figure S8

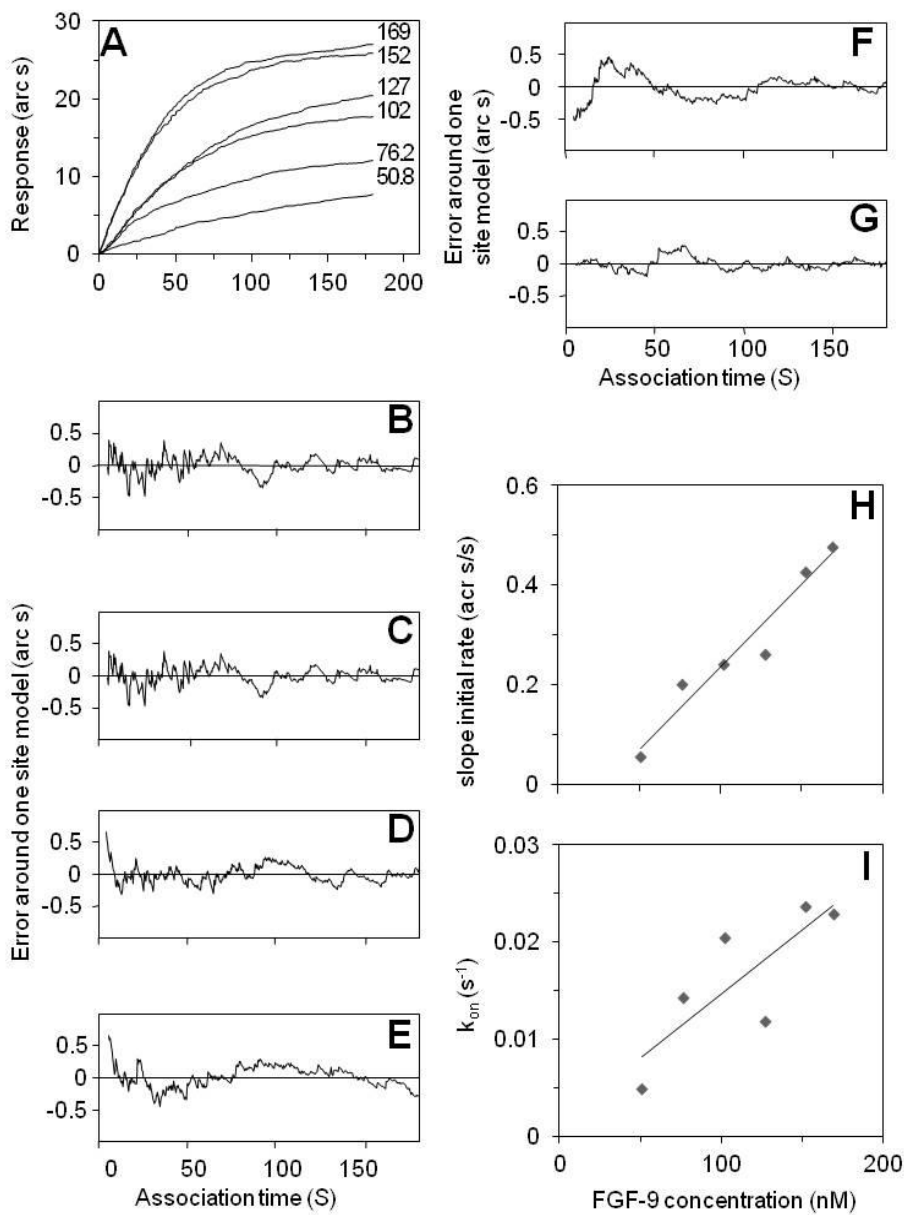

### FIGURE S9 Optical biosensor analysis of the interaction of FGF-9 with DP8

The binding kinetics of FGF-9 to immobilized DP8 were measured, as described under “**Experimental procedures**”. Different concentrations of FGF-9 were added to a streptavidin-derivatized amino silane cuvette functionalized with reducing end biotinylated DP8 (**Experimental procedures**). *A*, the association curves of the binding of different concentrations of FGF-9 were followed for one min. *B-F*, The distribution of the data points (jagged line) around a one-site model (horizontal line at 0 arc s) is shown for each of the concentrations of the FGF-9 used in the binding assay in panel *A*. Instrument noise is  $\pm 0.5$  arc s. Concentrations of FGF-9 are 169 nM (*B*), 152 nM (*C*), 127 nM (*D*), 102 nM (*E*) and 50.8 nM (*F*). *G*, Relationships between slope of initial rate, determined from a one-site binding model and concentration of FGF-9. *H*, relationships between  $k_{on}$ , determined from a one-site model and concentration of FGF-9.

Figure S9

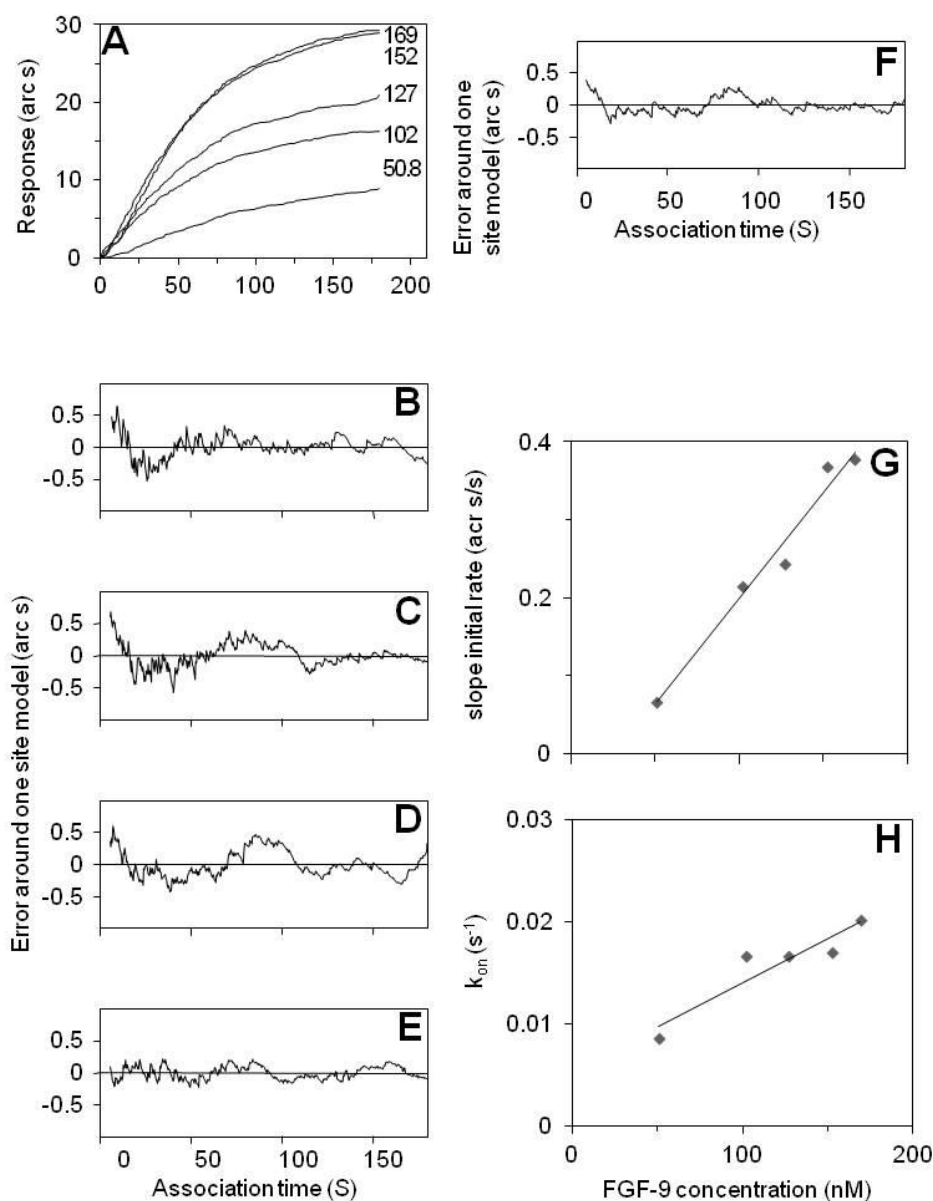

### FIGURE S 10 Microscale Thermophoresis analysis of the interaction of FGF-18 with DP8

FGF-18 bound to a heparin column to protect lysine residues important for sugar binding was labeled with NT-647 dye (**Experimental procedures**). The concentration of the labeled protein was kept constant at low nM concentration, while the concentration of the unlabeled sugar was varied. The samples were loaded into hydrophilic MST-grade glass capillaries after a short incubation period and an MST-Analysis was performed using the Monolith NT.115 (**Experimental procedures**). The normalized fluorescence  $F_{\text{norm}}$  is plotted for different concentrations of DP8. A  $K_D$  value of 50 nM was determined for this interaction. *B*.  $K_D$  value of 26 nM was determined for this interaction.

Figure S10

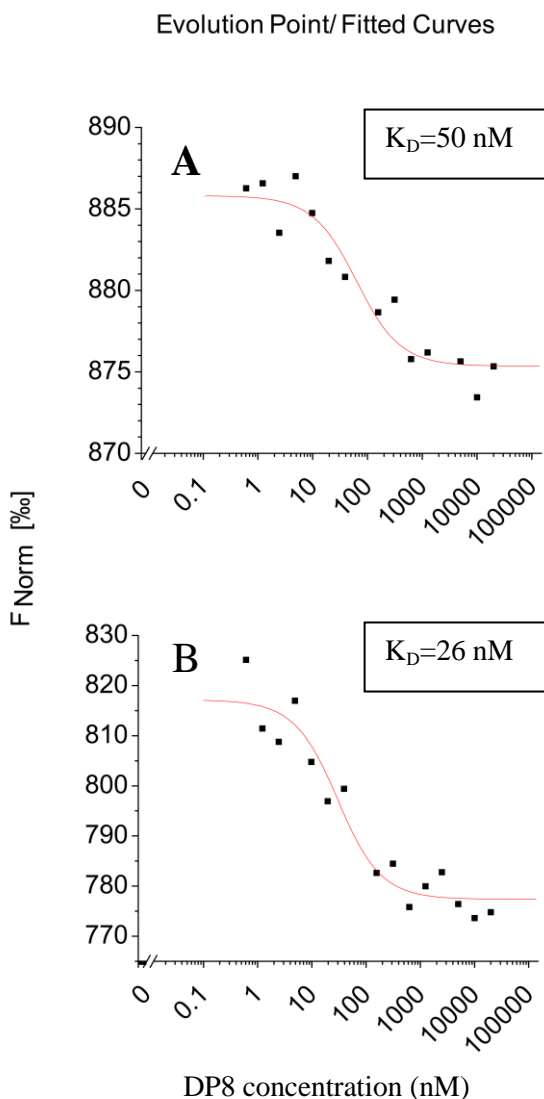

**FIGURE S11. Differential scanning fluorimetry FGF-9 bound to heparin.**

Differential scanning fluorimetry of 5  $\mu\text{M}$  FGF-9 in the presence of different concentrations of heparin (**Experimental procedures**): A. Melting curve profiles of FGF-9 (5  $\mu\text{M}$ ) with a range of heparin concentrations (0  $\mu\text{M}$ -25  $\mu\text{M}$ ). B. The first derivative of the melting curves in (A). C. Peak of the first derivative of the melting curves from (B), which is the melting temperature,  $T_m$  (mean of triplicates  $\pm$  SE).

Figure S11

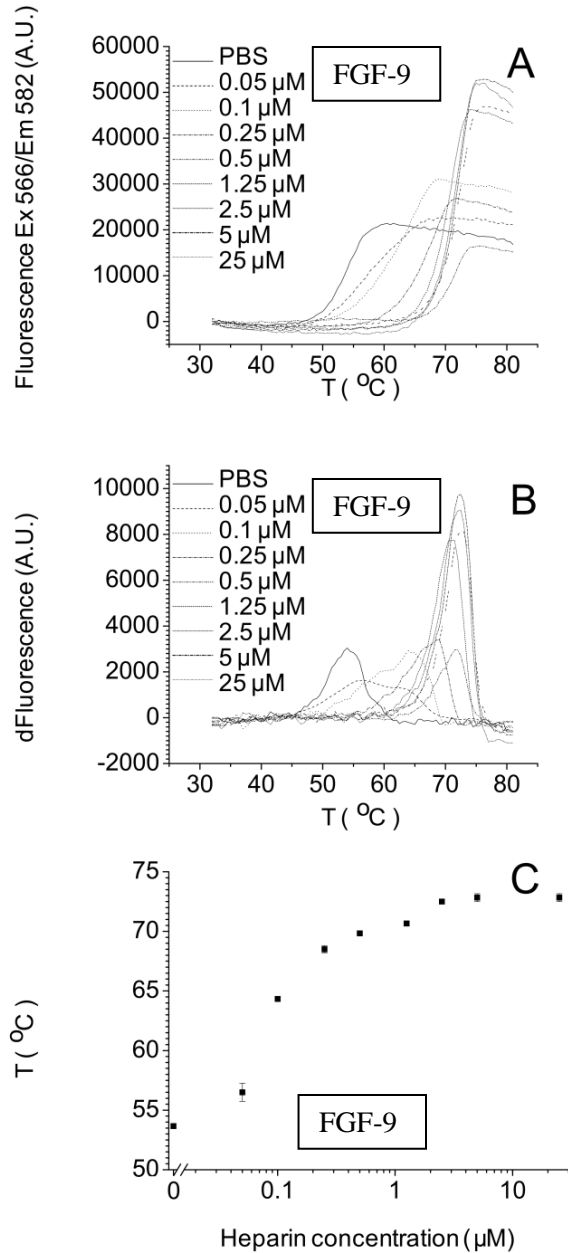

**FIGURE S12. Differential scanning fluorimetry FGF-21 bound to heparin.**

Differential scanning fluorimetry of 5  $\mu\text{M}$  FGF-21 in the presence of different concentrations of heparin (**Experimental procedures**): *A*. Melting curve profiles of FGF-21 (5  $\mu\text{M}$ ) with a range of heparin concentrations (0  $\mu\text{M}$ -500  $\mu\text{M}$ ). *B*. The first derivative of the melting curves in (*A*). *C*. Peak of the first derivative of the melting curves from (*B*), which is the melting temperature,  $T_m$  (mean of triplicates  $\pm$  SE).

Figure S12

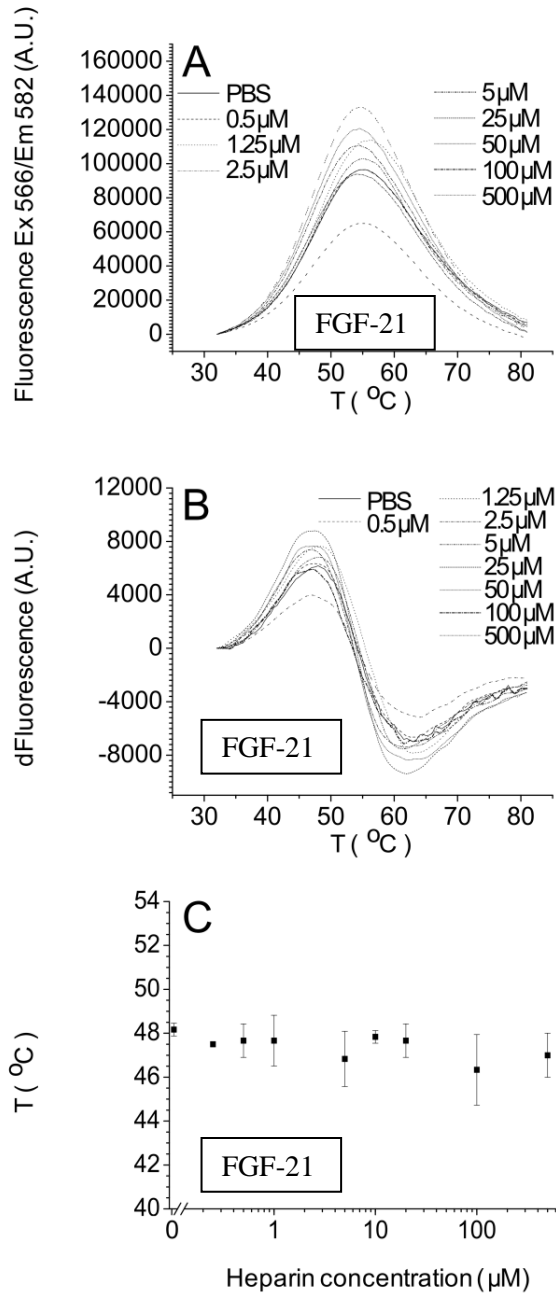

**FIGURE S13. Differential scanning fluorimetry FGF-1, FGF-2 and FGF-18 binding to heparin derivatives.**

Differential scanning fluorimetry was performed with a range of heparin-based poly- with 5  $\mu$ M protein and 0.175 mg/mL sugar. The relative thermal stabilization effect of: Controls (PBS and heparin), Cation modified heparin forms and other GAGs (HS, HA, CS and DS). Results are the mean of triplicates after normalisation  $\pm$  SE, an apparent absence of error bar is due to a small SE).

Figure S13

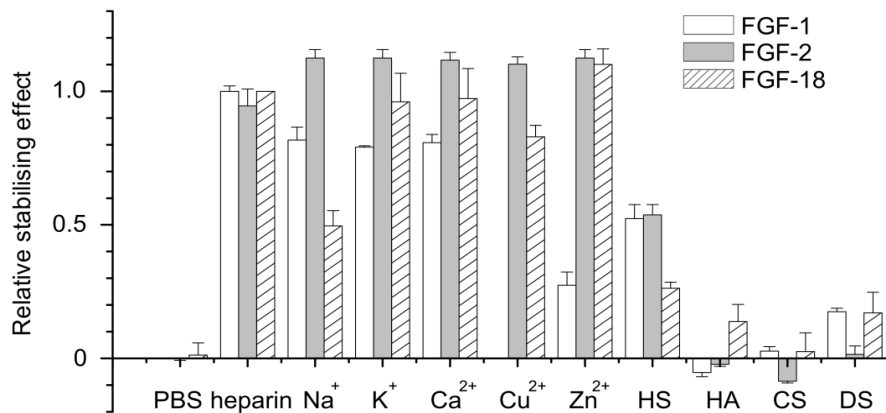

## SUPPLEMENTAL TABLES

### Table S1

#### Peptides identified by Protect and Label corresponding to the heparin binding sites of FGF-1, FGF-7, FGF-9 and FGF-18

The heparin binding sites were identified by Protect and Label (**Experimental procedures**) following purification the biotinylated peptides were identified by tandem mass spectrometry and analysed by Protein Prospector package v.5.9.2. The lists comprise the biotinylated peptides, with the site of biotinylation and any other modifications. According to this approach, the following ions can be considered as marker ions: m/z 84.08 and m/z 227.08 corresponding to Lys-NH<sub>3</sub> and biotin, m/z 310.16 assigned as Lys(biotin)-NH<sub>3</sub> and m/z 126.1 assigned as Lys(acetyl)-NH<sub>3</sub> (1).

Following tandem mass spectrometry of biotin labelled peptides, at least 10 of the most intense ions in each sample were fragmented by HCD and analyzed in the Orbitrap (Experimental Procedures). Data analysis included four chemical modifications: biotinylation, acetylation, carboxymethylation and oxidation.

In some cases, peptides possessed lysines that were only partly protected. Thus, they were both identified as acetyl and biotin derivatives, e.g., peptide of FGF-1, <sup>113</sup>ISKKHAEKNWF<sup>-123</sup> (**Table S1A**). This is likely to be caused by some of these lysines dissociating for sufficient time during the protection step to react with NHS-acetate, (The residues only labelled by biotin either remain bound or dissociate for too short a time to react in the protection step). When the site is univocally assigned the SLIP score is reported: e.g. Biotin@8=15 means that biotinylation on the lysine number 8 has a SLIP score of 15. As a rule of thumb a slip score >6 is ~ 95% confidence in site assignment.

<sup>a</sup>. m/z, mass(m)-over-charge(z) and it is the mass of the peptide divided by its charge. For MALDI charge is always +1, but for electrospray based mass spectrometry it is often +2 and +3.

<sup>b</sup>. z is the charge state of the peptide.

<sup>c</sup>. ppm, part per million, which indicates the error on the measurement of the precursor ion.

<sup>d</sup>. DB peptide is the peptide sequence.

<sup>e</sup>. Variable modification is the peptide modification: in some instances there is more than one combination of modifications that will yield an appropriate m/z with same probability. These are separated by the symbol "|". @ indicates the number of the modified residue and the number after = is a score for the assignment of the modification called SLIP score.

<sup>f</sup>. RT is retention time.

<sup>g</sup>. Score is the score assigned to the peptide identification by the search engine.

<sup>h</sup>. Expect is the probability associated with peptide identification (the lower the greater the likelihood of the assignment being correct).

**Table S1 A**

FGF-1: Uniprot Acc.: P05230, Uniprot ID: FGF1\_HUMAN, Species: HUMAN, Name: Heparin-binding growth factor 1, Organism: Homo sapiens, Gene: FGF1, Protein MW: 17459.8 Protein pI: 6.5 Protein Length: 155

Sequence of human FGF-1, labeled peptides are colored in red.

1-80 MAEGEITTF TALTEKFNLP PGNY **KKPKLLY**CSNGGHFLRILPDGTV DGTDRSDQH IQLQLSAESVGEVY **IKSTETGQYL**  
 81-155 AMDTDGLLYGSQTPNEECLFLERLEENHYNTY **ISKKHAEKWNFVGLKKN GSKRGRPRTHYGQKAIL**FLPLPVSSD

**Peptides and their modifications identified by mass spectrometry**

| m/z <sup>a</sup> | z <sup>b</sup> ppm <sup>c</sup> | DB Peptide <sup>d</sup> | Variable Mods <sup>e</sup>                                  | RT <sup>f</sup> | Score <sup>g</sup> | Expect <sup>h</sup> |
|------------------|---------------------------------|-------------------------|-------------------------------------------------------------|-----------------|--------------------|---------------------|
| 659.827          | 4 0.91                          | VGLKKN GSKRGRPRTHY      | Biotin@4;Biotin@5;Carbamidomethyl@9;Biotin@10               | 3240            | 30.4               | 2.60E-09            |
| 818.405          | 3 0.64                          | VGLKKN GSKRGRPRTHY      | Biotin@4=15;Acetyl@5=14;Carboxymethyl@9;Biotin@10=14        | 2805            | 16.5               | 6.30E-07            |
| 941.461          | 2 0.52                          | ISKKHA EKWNF            | Biotin@8=34;Acetyl@3&Biotin@4 Acetyl@4&Biotin@3             | 5693            | 26.4               | 9.00E-07            |
| 552.618          | 3 1.6                           | ISKKHA EKWNF            | Acetyl@3&Biotin@4 Acetyl@4&Biotin@3                         | 3958            | 31.8               | 1.10E-06            |
| 879.76           | 3 -0.55                         | VGLKKN GSKRGRPRTHY      | Biotin@4;Biotin@5;Carboxymethyl@9;Biotin@10                 | 3356            | 17.9               | 1.10E-06            |
| 538.613          | 3 -0.024                        | ISKKHA EKWNF            | Biotin@3 4                                                  | 3044            | 26.7               | 2.10E-06            |
| 828.422          | 2 0.79                          | ISKKHA EKWNF            | Biotin@8=15;Acetyl@3 4                                      | 4309            | 23.2               | 2.40E-06            |
| 846.921          | 2 0.29                          | ISKKHA EKWNF            | Biotin@8=24;Biotin@3 4                                      | 3273            | 22.1               | 2.70E-06            |
| 613.973          | 3 0.27                          | ISKKHA EKWNF            | Biotin@3=23;Biotin@4=23                                     | 4541            | 23.4               | 5.40E-06            |
| 807.417          | 2 0.7                           | ISKKHA EKWNF            | Biotin@8=17                                                 | 3665            | 16.9               | 1.10E-05            |
| 683.34           | 2 0.48                          | IKSTETGQYL              | Biotin@2                                                    | 3895            | 21.3               | 1.30E-05            |
| 689.333          | 3 1.1                           | ISKKHA EKWNF            | Biotin@3;Biotin@4;Biotin@8                                  | 5876            | 19.9               | 2.00E-05            |
| 754.888          | 2 0.097                         | ISKKHA EKWNF            | Biotin@3=6;Acetyl@4=6                                       | 2415            | 15.3               | 2.20E-05            |
| 552.617          | 3 0.23                          | ISKKHA EKWNF            | Acetyl@8=8;Biotin@3 4                                       | 4117            | 21.6               | 2.40E-05            |
| 867.927          | 2 0.6                           | ISKKHA EKWNF            | Biotin@3=30;Biotin@4=26;Acetyl@8=26                         | 4040            | 21.4               | 3.70E-05            |
| 552.617          | 3 0.45                          | ISKKHA EKWNF            | Biotin@8=11;Acetyl@3 4                                      | 4308            | 20.6               | 4.00E-05            |
| 627.977          | 3 0.68                          | ISKKHA EKWNF            | Biotin@8=13;Acetyl@3&Biotin@4 Acetyl@4&Biotin@3             | 5617            | 19.2               | 4.20E-05            |
| 774.887          | 2 0.41                          | ISKKHA EKWNF            | Biotin@8=38;Acetyl@3&Biotin@4 Acetyl@4&Biotin@3             | 2432            | 18.1               | 4.80E-05            |
| 849.427          | 2 -0.27                         | ISKKHA EKWNF            | Acetyl@8=16;Acetyl@3&Biotin@4 Acetyl@4&Biotin@3             | 5430            | 16.1               | 5.40E-05            |
| 959.96           | 2 0.53                          | ISKKHA EKWNF            | Biotin@3;Biotin@4;Biotin@8                                  | 4636            | 17.4               | 5.90E-05            |
| 775.893          | 2 -0.34                         | ISKKHA EKWNF            | Acetyl@8=23;Acetyl@3&Biotin@4 Acetyl@4&Biotin@3             | 3346            | 15.2               | 6.00E-05            |
| 775.893          | 2 -0.34                         | ISKKHA EKWNF            | Acetyl@3=18;Acetyl@4=19;Biotin@8=18                         | 3497            | 16.3               | 7.10E-05            |
| 849.427          | 2 -0.27                         | ISKKHA EKWNF            | Acetyl@3&4&Biotin@8 Acetyl@3&8&Biotin@4 Acetyl@4&8&Biotin@3 | 5177            | 18.4               | 7.70E-05            |
| 941.461          | 2 0.78                          | ISKKHA EKWNF            | Biotin@3=21;Biotin@4=18;Acetyl@8=18                         | 5505            | 17.8               | 8.70E-05            |
| 849.428          | 2 0.59                          | ISKKHA EKWNF            | Acetyl@3&4&Biotin@8 Acetyl@3&8&Biotin@4 Acetyl@4&8&Biotin@3 | 5012            | 18.9               | 1.30E-04            |
| 428.242          | 2 0.37                          | GQKAIL                  | Biotin@3                                                    | 4366            | 16.6               | 1.80E-04            |
| 610.849          | 2 0.3                           | KKPKLL                  | Biotin@4=17;Acetyl@1&Biotin@2 Acetyl@2&Biotin@1             | 5831            | 16.9               | 1.90E-04            |
| 518.815          | 2 -0.22                         | KKPKLL                  | Acetyl@1=12;Acetyl@2=11;Biotin@4=11                         | 5182            | 18.5               | 4.10E-04            |
| 610.849          | 2 0.5                           | KKPKLL                  | Acetyl@1&Biotin@2&4 Acetyl@2&Biotin@1&4 Acetyl@4&Biotin@1&2 | 5682            | 16.6               | 4.30E-04            |
| 867.927          | 2 0.46                          | ISKKHA EKWNF            | Biotin@8=16;Acetyl@3&Biotin@4 Acetyl@4&Biotin@3             | 4195            | 15.9               | 5.90E-04            |
| 518.815          | 2 0.48                          | KKPKLL                  | Acetyl@4=12;Acetyl@1&Biotin@2 Acetyl@2&Biotin@1             | 5031            | 17.9               | 7.20E-04            |
| 600.346          | 2 -0.17                         | KKPKLLY                 | Acetyl@1&2&Biotin@4 Acetyl@1&4&Biotin@2 Acetyl@2&4&Biotin@1 | 5443            | 16.7               | 9.30E-04            |

**Table S1B****Peptides identified by Protect and Label which corresponded to FGF-7 heparin binding sites**

Uniprot Acc.: P21781 Uniprot ID: FGF7\_HUMAN Species: HUMAN Name: Keratinocyte growth factor, Organism: Homo sapiens Gene: FGF7,



Protein MW: 22509.4 Protein pI: 9.3 Protein Length: 194

Sequence of human FGF-7, labeled peptides are colored in red.

1-80 MHKWILTWILPTLLYRSCFHIICLVGTISLACNDMTPEQMATNVNCSSPERHTRSVDYMEGGDIRVRRLLFCRTQWYLRID  
 81-160 KRGKVKGTQEMKNNYNIMEIRTVAVGIVAIGVESEFY LAMNKEGKLY AKKECNEDCNFKELILENHYNTRYASAKWTHNG  
 161-194 GEMFVALNQGKIPVRGKKTKEQKTAHFLPMAIT

### Peptides and their modifications identified by mass spectrometry

| m/z <sup>a</sup> | z <sup>b</sup> | ppm <sup>c</sup> | DB Peptide <sup>d</sup> | Variable Mods <sup>e</sup>                                                                                                                                                                                                                                                                                                                                                                                                                                            | RT <sup>f</sup> | Score <sup>g</sup> | Expect <sup>h</sup> |
|------------------|----------------|------------------|-------------------------|-----------------------------------------------------------------------------------------------------------------------------------------------------------------------------------------------------------------------------------------------------------------------------------------------------------------------------------------------------------------------------------------------------------------------------------------------------------------------|-----------------|--------------------|---------------------|
| 665.5878         | 4              | 1.1              | RIDKRGKVKGTQEMKNNY      | Biotin@9=9;Acetyl@15=23;Biotin@4 7                                                                                                                                                                                                                                                                                                                                                                                                                                    | 4914            | 19.1               | 2.60E-04            |
| 722.1085         | 4              | 2.8              | RIDKRGKVKGTQEMKNNY      | Biotin@4=36;Biotin@7=32;Biotin@9=19;Acetyl@15=19                                                                                                                                                                                                                                                                                                                                                                                                                      | 6479            | 17.2               | 2.90E-04            |
| 744.7269         | 3              | 1.5              | YLRIDKRGKVKGTQEM        | Acetyl@11=21;Acetyl@6&Biotin@9 Acetyl@9&Biotin@6                                                                                                                                                                                                                                                                                                                                                                                                                      | 6128            | 19.2               | 3.20E-04            |
| 725.8576         | 2              | 0.72             | LAMNKEGKLY              | Oxidation@3;Biotin@5=10;Acetyl@8=10                                                                                                                                                                                                                                                                                                                                                                                                                                   | 6385            | 18                 | 4.50E-04            |
| 1232.3158        | 3              | 3.3              | VALNQGKIPVRGKKTKEQKTAHF | Biotin@6=7;Biotin@17=9;Acetyl@20=9;Acetyl@13&Biotin@14&16 Acetyl@14&Biotin@13&16 Acetyl@16&Biotin@13&14                                                                                                                                                                                                                                                                                                                                                               | 8016            | 16.1               | 4.80E-04            |
| 1137.9135        | 3              | -1.5             | NQKGIPVRGKKTKEQKTAHF    | Biotin@3=13;Biotin@14=9;Acetyl@17=9;Acetyl@10&Biotin@11&13 Acetyl@11&Biotin@10&13 Acetyl@13&Biotin@10&11                                                                                                                                                                                                                                                                                                                                                              | 7426            | 17                 | 4.90E-04            |
| 807.6741         | 4              | 3.3              | NQKGIPVRGKKTKEQKTAHF    | Acetyl@17=18;Acetyl@3&14&Biotin@10&11&13 Acetyl@10&11&Biotin@3&13&14 Acetyl@10&13&Biotin@3&11&14 Acetyl@10&14&Biotin@3&11&13                                                                                                                                                                                                                                                                                                                                          | 6999            | 15.9               | 7.40E-04            |
| 831.3652         | 2              | 1.9              | ASAKWTHNGGEMF           | Biotin@4                                                                                                                                                                                                                                                                                                                                                                                                                                                              | 7114            | 15.1               | 8.90E-04            |
| 821.9487         | 4              | -0.88            | VALNQGKIPVRGKKTKEQKTAHF | Biotin@6=17;Acetyl@13&14&16&Biotin@17 Acetyl@13&14&16&Biotin@20 Acetyl@13&14&17&Biotin@16 Acetyl@13&14&20&Biotin@16 Acetyl@13&14&20&Biotin@17 Acetyl@13&16&17&Biotin@14 Acetyl@13&16&20&Biotin@14 Acetyl@13&17&20&Biotin@14 Acetyl@13&16&20&Biotin@17 Acetyl@13&17&20&Biotin@16 Acetyl@14&16&17&Biotin@13 Acetyl@14&16&20&Biotin@13 Acetyl@14&17&20&Biotin@13 Acetyl@16&17&20&Biotin@13 Acetyl@14&16&20&Biotin@17 Acetyl@14&17&20&Biotin@16 Acetyl@16&17&20&Biotin@14 | 6426            | 15.9               | 9.80E-04            |

### Table S1 C

#### Peptides identified by Protect and Label which corresponded to FGF-9 heparin binding sites

Uniprot Acc.: P31371, Uniprot ID: FGF9\_HUMAN, Species: HUMAN, Name: Glia-activating factor, Organism: Homo sapiens, Gene: FGF9, Protein MW: 23440.7, Protein pI: 7.1, Protein Length: 208

Sequence of human FGF-9, labeled peptides are colored in red.

1-80 MAPLGEVGNFYGVQDAVPPFGNVPLVDPSPVLLSDHLGQSEAGGLPRGPAVTDLDHLKGI LRRRQLYCRTGF HLEIFPNG  
 81-160 TIQGTRKDHSRFGILEFISIAVGLVSI RGVDSGLYLG MNEKGELYGSEKLTQECVFR EQFEENWYNTYSSNLY KHVDTGR  
 161-208 RYVALNKDGT PREGTRTKRHQKFT HFLPRPVD PDKVPELY KDILSQS

### Peptides and their modifications identified by mass spectrometry

| m/z <sup>a</sup> | z <sup>b</sup> | ppm <sup>c</sup> | DB Peptide <sup>d</sup> | Variable Mods <sup>e</sup>   | RT <sup>f</sup> | Score <sup>g</sup> | Expect <sup>h</sup> |
|------------------|----------------|------------------|-------------------------|------------------------------|-----------------|--------------------|---------------------|
| 1039.863         | 3              | 2.9              | VALNKDGT PREGTRTKRHQKF  | Biotin@5;Biotin@16;Biotin@20 | 5895            | 22.1               | 5.10E-06            |
| 516.6642         | 5              | -0.66            | HLEIFPNGTIQGTRKDHSRF    | Biotin@15                    | 6836            | 17.1               | 1.10E-04            |
| 1125.074         | 2              | -0.72            | THFLPRPVD PDKVPELY      | Biotin@12                    | 8652            | 19.3               | 1.60E-04            |
| 453.2316         | 3              | 0.65             | KHVDTGRRY               | Biotin@1                     | 2709            | 21.1               | 4.60E-04            |

**Table S1 D****Peptides identified by Protect and Label which corresponded to FGF-18 heparin binding sites**

Uniprot Acc.: O76093, Uniprot ID: FGF18\_HUMAN, Species: HUMAN, Name: Fibroblast growth factor 18, Organism: Homo sapiens, Gene: FGF18, Protein MW: 23988.9, Protein pI: 9.9, Protein Length: 207

Sequence of human FGF-18, labeled peptides are colored in red.

1-80 MYSAPSACTCLCLHFLLLCFVQVQLVAEENVDFRIHVENQTRARDDVSRKQLRLYQLYSRTSGKHIQVLGRRISARGEDG  
 81-160 DKYAQLLVETDFTFGSQVRIKGGKTEFYLCMNRKGLVGGKPDGTSKECVFIEKVLNNYTALMSAKYSGWYVGFTHKGRPR  
 161-207 KGPKTRENQQDVHFMKRYPKGQPELQKPKFYTTVTKRSRRIRPTHPA

**Peptides and their modifications identified by mass spectrometry**

| m/z <sup>a</sup> | z <sup>b</sup> | ppm <sup>c</sup> | DB Peptide <sup>d</sup> | Variable Mods <sup>e</sup>                                                                               | RT <sup>f</sup> | Score <sup>g</sup> |
|------------------|----------------|------------------|-------------------------|----------------------------------------------------------------------------------------------------------|-----------------|--------------------|
| 1263.1241        | 2              | 3.4              | MKRYPKGQPELQKPF         | Biotin@2;Biotin@6;Biotin@13                                                                              | 8177            | 30.6 2.30E-06      |
| 723.3748         | 3              | -2.1             | KRYPKGQPELQKPF          | Biotin@1=10;Biotin@12=42                                                                                 | 6829            | 34.7 3.70E-06      |
| 767.057          | 3              | 0.7              | MKRYPKGQPELQKPF         | Biotin@6=10;Biotin@13=47                                                                                 | 7328            | 29.6 8.90E-06      |
| 781.0624         | 3              | 3.1              | MKRYPKGQPELQKPF         | Biotin@2=10;Acetyl@6=10;Biotin@13=42                                                                     | 8007            | 29.6 1.20E-05      |
| 1197.6047        | 2              | 4.3              | KRYPKGQPELQKPF          | Biotin@1;Biotin@5;Biotin@12                                                                              | 8118            | 26.5 1.20E-05      |
| 705.7014         | 3              | 0.87             | MKRYPKGQPELQKPF         | Acetyl@6=10;Biotin@13=38                                                                                 | 6717            | 30.6 1.20E-05      |
| 737.3826         | 3              | 3.8              | KRYPKGQPELQKPF          | Biotin@1=11;Acetyl@5=11;Biotin@12=37                                                                     | 7797            | 28.6 1.40E-05      |
| 676.025          | 3              | 1.3              | KRYPKGQPELQKPF          | Acetyl@1=51;Acetyl@5=39;Biotin@12=39                                                                     | 7377            | 24.3 1.50E-05      |
| 1013.5351        | 2              | 2.5              | KRYPKGQPELQKPF          | Biotin@1=8;Acetyl@5=8;Acetyl@12=50                                                                       | 7047            | 28.5 1.60E-05      |
| 662.0231         | 3              | 3.7              | KRYPKGQPELQKPF          | Acetyl@5=8;Biotin@12=36                                                                                  | 6467            | 32.8 2.00E-05      |
| 737.3812         | 3              | 1.9              | KRYPKGQPELQKPF          | Biotin@12=38;Acetyl@1&Biotin@5 Acetyl@5&Biotin@1                                                         | 7947            | 26.5 2.80E-05      |
| 662.0191         | 3              | -2.3             | KRYPKGQPELQKPF          | Acetyl@12=25;Biotin@1 5                                                                                  | 5994            | 26.6 3.00E-05      |
| 1058.0505        | 2              | 2.8              | MKRYPKGQPELQKPF         | Biotin@6=6;Acetyl@13=34                                                                                  | 6433            | 29.6 3.10E-05      |
| 834.0881         | 3              | -0.47            | RKGLVGGKPDGTSKECVF      | Biotin@2=30;Biotin@4=20;Acetyl@14=21;Carbamidomethyl@16                                                  | 6697            | 23.3 4.10E-05      |
| 786.3913         | 3              | -0.41            | MKRYPKGQPELQKPF         | Oxidation@1;Biotin@2=45;Biotin@6=25;Acetyl@13=25                                                         | 7250            | 21.5 4.50E-05      |
| 1105.5688        | 2              | 2.4              | KRYPKGQPELQKPF          | Biotin@1=46;Biotin@5=27;Acetyl@12=27                                                                     | 7579            | 18.2 5.00E-05      |
| 767.0577         | 3              | 1.6              | MKRYPKGQPELQKPF         | Biotin@2=13;Biotin@13=31                                                                                 | 7021            | 20.2 5.60E-05      |
| 705.7009         | 3              | 0.16             | MKRYPKGQPELQKPF         | Biotin@2=10;Acetyl@13=34                                                                                 | 6261            | 30.7 5.60E-05      |
| 781.0605         | 3              | 0.66             | MKRYPKGQPELQKPF         | Biotin@2=41;Biotin@6=31;Acetyl@13=31                                                                     | 7837            | 26.6 6.20E-05      |
| 992.5297         | 2              | 2.4              | KRYPKGQPELQKPF          | Acetyl@12=29;Biotin@1 5                                                                                  | 6177            | 29.5 6.60E-05      |
| 719.7047         | 3              | 0.55             | MKRYPKGQPELQKPF         | Biotin@2=10;Acetyl@6=10;Acetyl@13=44                                                                     | 7327            | 26.6 7.90E-05      |
| 873.9468         | 2              | 1.1              | GSQVRIKGGKTEF           | Acetyl@7=10;Biotin@9=10                                                                                  | 6398            | 20.2 9.20E-05      |
| 637.3211         | 3              | 0.57             | GSQVRIKGGKTEFY          | Acetyl@7=16;Biotin@9=16                                                                                  | 6807            | 15 9.20E-05        |
| 676.0225         | 3              | -2.4             | KRYPKGQPELQKPF          | Acetyl@1=10;Biotin@5=10;Acetyl@12=27                                                                     | 7228            | 22.3 9.40E-05      |
| 1044.4918        | 3              | 5.8              | CMNRKGLVGGKPDGTSKECVF   | Carbamidomethyl@1;Biotin@5=38;Biotin@7=26;Carbamidomethyl@19;Acetyl@11<br>&Biotin@17 Acetyl@17&Biotin@11 | 8173            | 17.2 1.20E-04      |
| 1084.5636        | 2              | 2.6              | KRYPKGQPELQKPF          | Biotin@12=36;Biotin@1 5                                                                                  | 6997            | 23.4 1.20E-04      |
| 969.1294         | 3              | 3                | CMNRKGLVGGKPDGTSKECVF   | Carbamidomethyl@1;Biotin@5=30;Biotin@7=19;Carbamidomethyl@19;Acetyl@11 17                                | 6936            | 18.3 1.30E-04      |
| 1030.4867        | 3              | 4.4              | CMNRKGLVGGKPDGTSKECVF   | Carbamidomethyl@1;Biotin@5=28;Biotin@7=19;Biotin@17=9;Carbamidomethyl@19                                 | 7476            | 20.3 1.60E-04      |
| 872.1047         | 3              | 2.2              | NRKGLVGGKPDGTSKECVF     | Biotin@3=22;Biotin@5=15;Acetyl@15=15;Carbamidomethyl@17                                                  | 6674            | 25.5 1.70E-04      |
| 933.4596         | 3              | 1.2              | NRKGLVGGKPDGTSKECVF     | Biotin@3=22;Biotin@5=15;Biotin@15=13;Carbamidomethyl@17                                                  | 7258            | 26.5 1.70E-04      |
| 648.0171         | 3              | -0.0012          | KRYPKGQPELQKPF          | Biotin@5=10                                                                                              | 4899            | 22.3 1.90E-04      |
| 873.9473         | 2              | 1.7              | GSQVRIKGGKTEF           | Biotin@7=19;Acetyl@9=19                                                                                  | 6247            | 20.2 2.00E-04      |

|           |   |       |                         |                                                                                  |      |      |          |
|-----------|---|-------|-------------------------|----------------------------------------------------------------------------------|------|------|----------|
| 1047.5133 | 2 | 2.2   | GSQVRIKGGKETEFL         | Biotin@7;Biotin@9                                                                | 7577 | 18.2 | 2.00E-04 |
| 662.0212  | 3 | 0.87  | KRYPKGGQPELQKPF         | Biotin@1=12;Acetyl@5=12                                                          | 5745 | 16.6 | 2.30E-04 |
| 786.3911  | 3 | -0.66 | MKRYPKGGQPELQKPF        | Oxidation@1;Biotin@2=20;Acetyl@6=20;Biotin@13=20                                 | 7798 | 19.1 | 2.60E-04 |
| 772.3875  | 3 | -0.78 | MKRYPKGGQPELQKPF        | Oxidation@1;Biotin@2=8;Biotin@13=16                                              | 6518 | 20.2 | 2.70E-04 |
| 637.3204  | 3 | -0.53 | GSQVRIKGGKETEFL         | Biotin@7=22;Acetyl@9=22                                                          | 6662 | 16.1 | 2.70E-04 |
| 661.0129  | 3 | 1.5   | GSQVRIKGGKETEFL         | Biotin@7=13                                                                      | 7100 | 16.8 | 2.90E-04 |
| 729.8461  | 2 | 0.86  | CMNRKGGK                | Carbamidomethyl@1;Biotin@5;Biotin@7                                              | 5697 | 17   | 2.90E-04 |
| 648.0168  | 3 | -0.46 | KRYPKGGQPELQKPF         | Biotin@12=22                                                                     | 5560 | 31.7 | 3.90E-04 |
| 807.9112  | 2 | 1.3   | MKRYPKGGQPEL            | Biotin@2=11;Acetyl@6=11                                                          | 5603 | 16.3 | 4.00E-04 |
| 723.3759  | 3 | -0.55 | KRYPKGGQPELQKPF         | Biotin@1=19;Biotin@5=6                                                           | 6369 | 16   | 4.00E-04 |
| 623.318   | 3 | 1.3   | GSQVRIKGGKETEFL         | Biotin@7=19                                                                      | 5397 | 17.2 | 4.20E-04 |
| 909.4492  | 3 | 1.7   | RKGGKLVGGPDGTSKECVF     | Biotin@2=27;Biotin@4=17;Carbamidomethyl@16;Acetyl@8&Biotin@14 Acetyl@14&Biotin@8 | 8150 | 17.2 | 4.50E-04 |
| 637.5895  | 4 | 1.6   | RIHVENQTRARDDVSRKQL     | Biotin@17                                                                        | 3617 | 16   | 5.10E-04 |
| 890.4363  | 4 | 2.1   | TKKGRPRKGGPKTRENQQDVHFM | Biotin@2;Biotin@3;Biotin@8;Biotin@11;Oxidation@22                                | 5111 | 15.6 | 5.10E-04 |
| 694.3553  | 2 | 1.9   | LCMNRKGGK               | Carbamidomethyl@2;Acetyl@6=14;Biotin@8=14                                        | 5578 | 18   | 5.40E-04 |
| 623.3184  | 3 | 1.9   | GSQVRIKGGKETEFL         | Biotin@9=11                                                                      | 5557 | 17.2 | 5.80E-04 |
| 786.3855  | 2 | -2.5  | LCMNRKGGK               | Carbamidomethyl@2;Biotin@6;Biotin@8                                              | 6533 | 18   | 6.80E-04 |
| 602.6298  | 3 | 2.1   | GRRISARGEDGDY           | Biotin@13                                                                        | 2508 | 17.3 | 7.50E-04 |
| 965.9811  | 2 | 1.8   | GSQVRIKGGKETEFL         | Biotin@7;Biotin@9                                                                | 7249 | 16.1 | 7.80E-04 |
| 1008.8216 | 3 | 3.9   | NRKGGKLVGGPDGTSKECVF    | Biotin@3;Biotin@5;Biotin@9;Biotin@15;Carbamidomethyl@17                          | 8217 | 15   | 8.30E-04 |
| 834.4233  | 2 | -0.18 | KRYPKGGQPEL             | Biotin@1;Biotin@5                                                                | 6052 | 15.4 | 8.90E-04 |
| 736.3723  | 3 | 1.6   | GSQVRIKGGKETEFL         | Biotin@7;Biotin@9                                                                | 8278 | 16.1 | 8.90E-04 |
| 852.9408  | 2 | 0.33  | GSQVRIKGGKETEFL         | Biotin@9=10                                                                      | 5067 | 17.2 | 9.00E-04 |

**Table S2****Comparison of the secondary structures FGFs deduced from SRCD spectra.**

| Sample         | Helix1 | Helix2 | Strand1 | Strand2 | Turns | Unordered | Total |
|----------------|--------|--------|---------|---------|-------|-----------|-------|
| FGF-1          | -0.001 | 0.027  | 0.293   | 0.195   | 0.228 | 0.250     | 0.993 |
| 5:1 (H:FGF-1)  | 0.053  | 0.083  | 0.211   | 0.111   | 0.211 | 0.339     | 1.009 |
| FGF-2          | 0.000  | 0.018  | 0.247   | 0.118   | 0.297 | 0.314     | 0.994 |
| 5:1 (H:FGF-2)  | 0.000  | 0.000  | 0.015   | 0.096   | 0.285 | 0.610     | 1.006 |
| FGF-7          | 0.211  | 0.136  | 0.043   | 0.067   | 0.231 | 0.314     | 1.001 |
| 5:1 (H:FGF-7)  | 0.001  | 0.000  | 0.012   | 0.094   | 0.284 | 0.608     | 0.999 |
| FGF-9          | 0.536  | 0.224  | 0.001   | 0.001   | 0.107 | 0.139     | 1.008 |
| 5:1 (H:FGF-9)  | 0.054  | 0.082  | 0.210   | 0.110   | 0.211 | 0.337     | 1.004 |
| FGF-18         | 0.000  | 0.000  | 0.015   | 0.095   | 0.285 | 0.609     | 1.004 |
| 5:1 (H:FGF-18) | 0.054  | 0.083  | 0.211   | 0.110   | 0.212 | 0.335     | 1.004 |
| FGF-21         | 0.421  | 0.245  | 0.050   | 0.038   | 0.117 | 0.137     | 1.008 |
| 5:1 (H:FGF-21) | 0.422  | 0.245  | 0.050   | 0.038   | 0.117 | 0.138     | 1.009 |

SRCD spectra were recorded on beamline B-23 at Diamond Synchrotron between 180 nm and 260 nm of the FGF alone and in the presence of a 5-fold molar excess of heparin. The spectra were analysed by programmes Selcon 3 and Database 3 (**Experimental procedures**).

**Table S3****FGF-7 and heparin complexes' concentrations and their mean TM values based on 3 repeats ( $\pm$ SE).**

| Heparin concentration |               | Molar ratio (heparin: FGF-7) | TM                 |     |
|-----------------------|---------------|------------------------------|--------------------|-----|
| $\mu\text{g/mL}$      | $\mu\text{M}$ | -                            | $^{\circ}\text{C}$ | +/- |
| 0                     | 0             | 0                            | 60.7               | 0.3 |
| 8.75                  | 0.5           | 0.1                          | 61                 | 0   |
| 21.9                  | 1.25          | 0.25                         | 65.7               | 0.8 |
| 43.8                  | 2.5           | 0.5                          | 66.2               | 0.6 |
| 87.5                  | 5             | 1                            | 68.2               | 0.3 |
| 437.5                 | 25            | 5                            | 68                 | 0.5 |
| 875                   | 50            | 10                           | 67.8               | 0.3 |
| 1750                  | 100           | 20                           | 68                 | 0.5 |
| 8750                  | 500           | 100                          | 67.8               | 0.3 |

**Table S4****FGF-9 and heparin complexes' concentrations and their mean TM values based on 3 repeats ( $\pm$ SE).**

| Heparin concentration |               | Molar ratio (heparin: FGF-9) | TM                 |     |
|-----------------------|---------------|------------------------------|--------------------|-----|
| $\mu\text{g/mL}$      | $\mu\text{M}$ | -                            | $^{\circ}\text{C}$ | +/- |
| 0                     | 0             | 0                            | 53.7               | 0.3 |
| 0.88                  | 0.05          | 0.01                         | 56.5               | 1.3 |
| 1.75                  | 0.1           | 0.02                         | 64.3               | 0.3 |
| 4.38                  | 0.25          | 0.05                         | 68.5               | 0.5 |
| 8.75                  | 0.5           | 0.1                          | 69.8               | 0.3 |
| 21.9                  | 1.25          | 0.25                         | 70.7               | 0.3 |
| 43.8                  | 2.5           | 0.5                          | 72.5               | 0   |
| 87.5                  | 5             | 1                            | 72.8               | 0.6 |
| 437.5                 | 25            | 5                            | 72.8               | 0.6 |

**Table S5****FGF-21 and heparin complexes' concentrations and their mean TM values based on 3 repeats ( $\pm$  SE).**

| Heparin concentration |               | Molar ratio (heparin: FGF-21) |  | TM                 |     |
|-----------------------|---------------|-------------------------------|--|--------------------|-----|
| $\mu\text{g/mL}$      | $\mu\text{M}$ | -                             |  | $^{\circ}\text{C}$ | +/- |
| 0                     | 0             | 0                             |  | 48.2               | 0.3 |
| 8.75                  | 0.5           | 0.1                           |  | 47.5               | 0   |
| 21.9                  | 1.25          | 0.25                          |  | 47.7               | 0.8 |
| 43.8                  | 2.5           | 0.5                           |  | 47.7               | 1.2 |
| 87.5                  | 5             | 1                             |  | 46.8               | 1.3 |
| 437.5                 | 25            | 5                             |  | 47.8               | 0.3 |
| 875                   | 50            | 10                            |  | 47.7               | 0.8 |
| 1750                  | 100           | 20                            |  | 46.3               | 1.6 |
| 8750                  | 500           | 100                           |  | 47                 | 1.0 |

**REFERENCE:**

1. Ori, A., Free, P., Courty, J., Wilkinson, M.C., and Fernig, D.G. (2009) Identification of heparin-binding sites in proteins by selective labeling. *Mol. Cell Proteomics* **8**, 2256-2265
